# Supplementary material for: Bridging green light photocatalysis over hierarchical Nb2O5 for the selective aerobic oxidation of sulfides
Source: Royal Society of Chemistry journal article supplement (doi:10.1039/d0ta10757c), 2020-12-10
Supplement: d0ta10757c1.pdf [file d0ta10757c1.pdf]

## Electronic Supplementary Information

# Bridging green light photocatalysis over hierarchical Nb<sub>2</sub>O<sub>5</sub> for selective aerobic oxidation of sulfides

Xiaoming Ma<sup>a</sup>, Huimin Hao<sup>a</sup>, Wenlong Sheng<sup>a</sup>, Fengwei Huang<sup>a</sup>, and Xianjun Lang<sup>a\*</sup>

<sup>a</sup> *Sauvage Center for Molecular Sciences, College of Chemistry and Molecular Sciences, Wuhan University, Wuhan 430072, China.*

\*To whom correspondence should be addressed (Prof. X. J. Lang). E-mail:

[xianjunlang@whu.edu.cn](mailto:xianjunlang@whu.edu.cn).

## **1. Experimental**

### **1.1 Reagents and solvents**

All the reagents were procured from commercial suppliers such as Sigma-Aldrich, Alfa Aesar and TCI, J&K Scientific, etc. The solvents were supplied by Merck, Fischer Scientific and Sinopharm Chemical Reagent Co. Ltd., China. Methanol-D<sub>4</sub> was purchased from Cambridge Isotope Laboratories, Inc. Nb<sub>2</sub>O<sub>5</sub> nanoparticles was purchased from Innochem. All the reagents and solvents were directly used without further purification.

### **1.2 Preparation of hierarchical Nb<sub>2</sub>O<sub>5</sub>**

Hierarchical Nb<sub>2</sub>O<sub>5</sub> was prepared by hydrothermal method by previous report. In detail, put 2 mmol of niobium oxalate into 25 mL of deionized water and stirred at 60 °C for 10 min under completely dissolve. Meanwhile, 1 mmol of L-Arginine was dissolved in 5 mL of deionized water and stirred for 5 min. Then the L-Arginine solution was added dropwise in the solution of niobium oxalate with stirring for 10 min. Next the mixed liquor was shifted into a 50 mL Teflon-lined autoclave and heated at 180 °C for 12 h. Naturally cooling autoclave to room temperature, the Nb<sub>2</sub>O<sub>5</sub> precipitates were collected, cleaned with deionized water several times and dried in a vacuum oven at 60 °C for 12 h.

### **1.3 Characterization**

Transmission electron microscopy (TEM) and high-resolution transmission electron microscopy (HRTEM) images were collected on a JEOL JEM2012-FEF

operated at 200 kV. Scanning electron microscopy (SEM) images of the solid samples were measured on Zeiss Merlin Compact field emission scanning electron microscope. X-ray powder diffraction (PXRD) measurement was carried out using a Rigaku/Miniflex 600 diffractometer with filtered Cu K $\alpha$  radiation, and the data were collected from 10° to 70°. The UV-visible absorbance of ARS, Nb<sub>2</sub>O<sub>5</sub> and ARS-Nb<sub>2</sub>O<sub>5</sub> samples were measured on UV-3600 UV-vis spectrophotometer (Shimadzu, Japan) equipped with a diffuse reflectance measurement accessory, BaSO<sub>4</sub> was used as a reflectance standard. The specific surface areas were determined by N<sub>2</sub> physisorption using an ASAP automated system and the Brunauer-Emmet-Teller (BET) method. Each sample was degassed under vacuum ( $<1 \times 10^{-5}$  bar) in the Micromertics system at 120 °C for 6 h prior to N<sub>2</sub> physisorption. The EPR tests were executed on an electron paramagnetic resonance (EPR) spectrometer (JEOL, JES-FA300).

#### **1.4 Typical Procedure for the photocatalytic selective oxidation of sulfides with air**

Firstly, 25 mg of Nb<sub>2</sub>O<sub>5</sub>, 0.25 mmol of thioanisole, 5  $\mu$ mol of TEMPO, 0.5  $\mu$ mol of ARS, and 0.5 mL of CH<sub>3</sub>OH were mixed in a 10 mL Pyrex vessel. Then, the mixture was maintained for 10 min at ultrasonication and stirred for 30 min in dark to reach adsorption equilibrium. Next the Pyrex vessel was put on a magnetic stirring apparatus and the reactive mixture was stirred at 1500 rpm. Afterwards, irradiated with 520 nm green LED irradiation (3 W  $\times$  4) connected to air by a hole in the rubber septum. Finally, the photocatalyst ARS-Nb<sub>2</sub>O<sub>5</sub> were separated from the reaction mixture by centrifugation. The reaction product was analyzed by gas chromatography equipped

with a flame ionization detector (GC-FID, Agilent 7890B) using chlorobenzene as the internal standard. The structures of products were confirmed by comparison with the retention time of standard samples and further confirmed by gas chromatography–mass spectrometry (GC–MS).

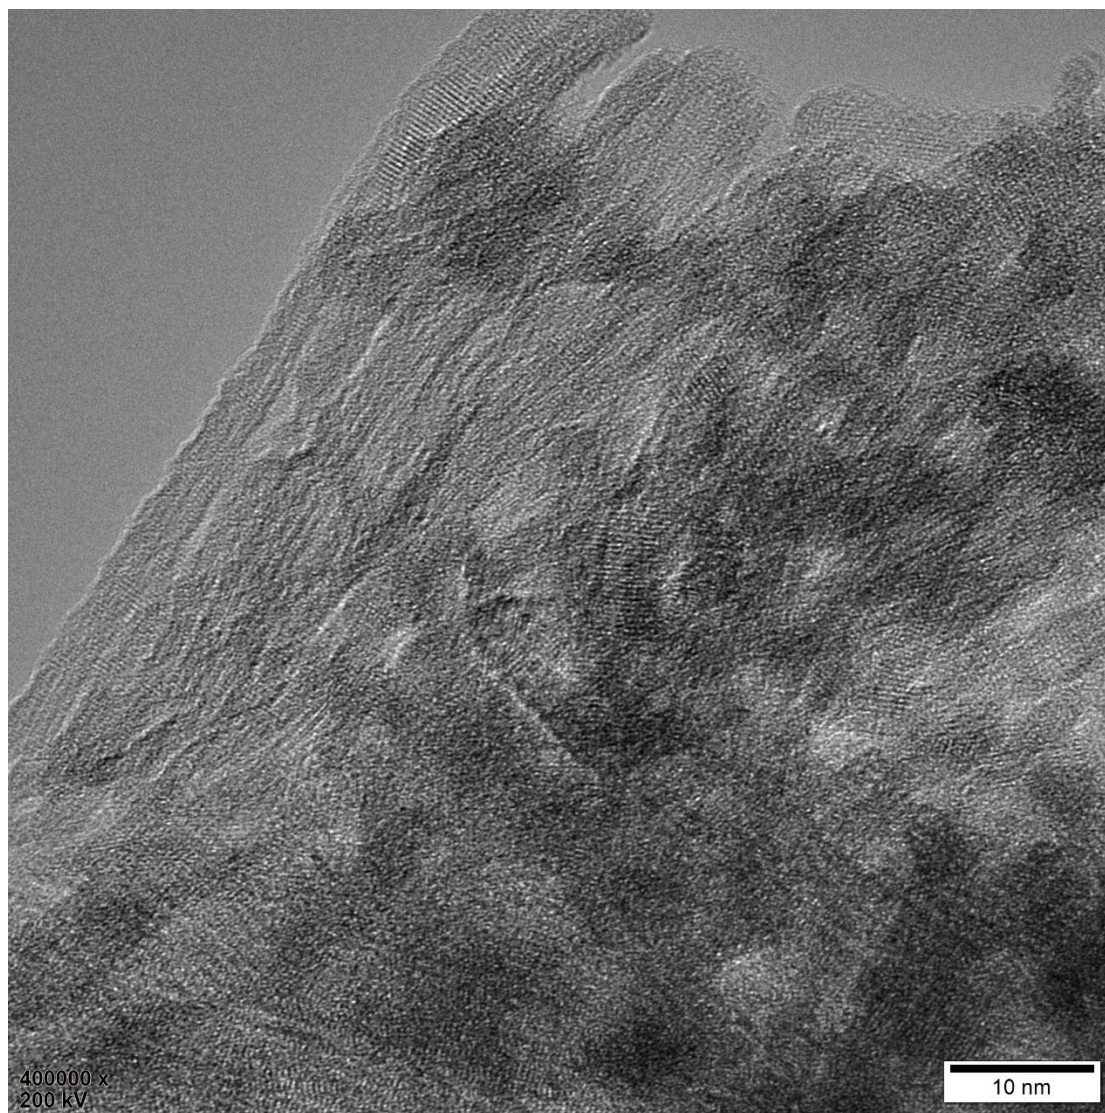

**Fig. S1.** The high-resolution transmission electron microscopy (HRTEM) image of hierarchical Nb<sub>2</sub>O<sub>5</sub>.

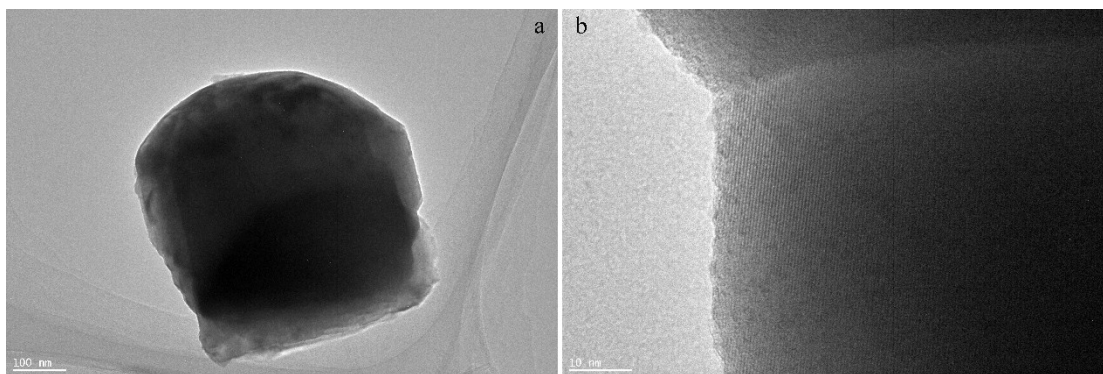

**Fig. S2.** The transmission electron microscopy (TEM) images of  $\text{Nb}_2\text{O}_5$  nanoparticles.

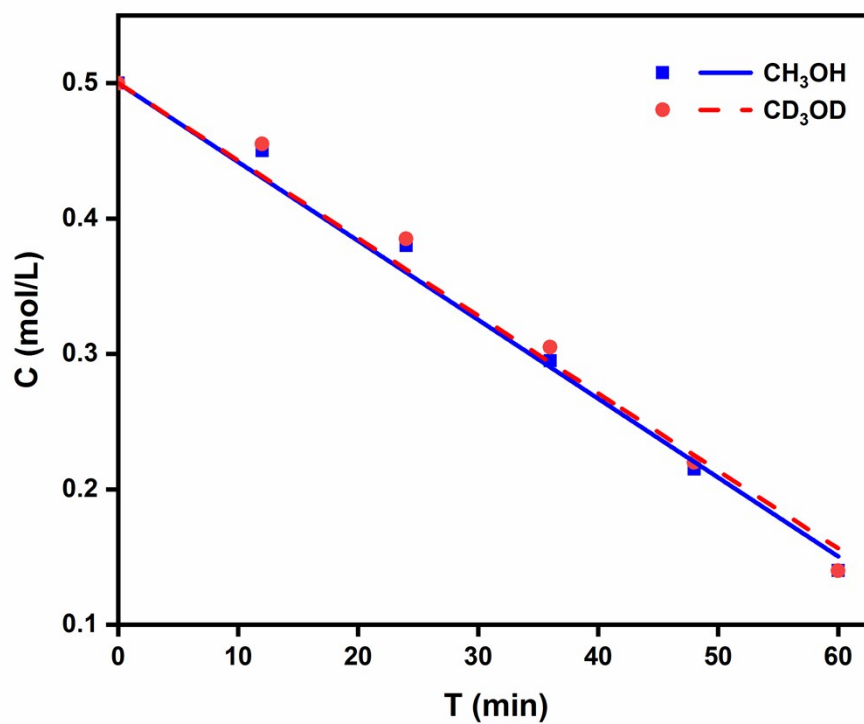

**Fig. S3.** The reaction kinetic curves studies of the visible-light-derived selective oxidation of sulfides into sulfoxides with air in the merger of  $\text{ARS-Nb}_2\text{O}_5$  photocatalysis with TEMPO catalysis in  $\text{CH}_3\text{OH}$  and  $\text{CD}_3\text{OD}$ .

**Table S1.** Influence of solvent on the photocatalytic selective aerobic oxidation of methyl phenyl sulfide<sup>[a]</sup>.

| Entry | Solvent                          | Conv.[%] <sup>[b]</sup> | Sel.[%] <sup>[b]</sup> |
|-------|----------------------------------|-------------------------|------------------------|
| 1     | CH <sub>3</sub> OH               | 66                      | 99                     |
| 2     | C <sub>2</sub> H <sub>5</sub> OH | 52                      | 99                     |
| 3     | CH <sub>3</sub> CN               | 1                       | -                      |

[a] Reaction conditions: methyl phenyl sulfide (0.25 mmol), TEMPO (5  $\mu$ mol), Nb<sub>2</sub>O<sub>5</sub> (25 mg), ARS (0.5  $\mu$ mol), aerial O<sub>2</sub>, green LEDs (520  $\pm$  15 nm, 3 W  $\times$  4), solvent (0.5 mL), 50 min. [b] Determined by GC-FID using chlorobenzene as the internal standard, conversion of sulfides, and selectivity of sulfoxides.
